# Supplementary material for: Polar derivatives of the [closo-1-CB9H10]− cluster as positive Δε additives to nematic hosts
Source: Royal Society of Chemistry journal article supplement (doi:10.1039/b913701g), 2009-01-01
Supplement: b913701g.pdf [file b913701g.pdf]

## Electronic Supplementary Information for

### **Polar Derivatives of the [*closo*-1-CB<sub>9</sub>H<sub>10</sub>] Cluster as Positive $\Delta$ s Additives to Nematic**

#### **Hosts**

Bryan Ringstrand, Piotr Kaszynski,\* and Adam Januszko

*Organic Materials Research Group*

*Department of Chemistry, Vanderbilt University, Nashville, TN 37235*

Victor G. Young Jr.

*X-ray Crystallographic Laboratory*

*Department of Chemistry*

*University of Minnesota, Twin Cities, MN 55455*

#### **Table of Content:**

|                                                                                     |        |
|-------------------------------------------------------------------------------------|--------|
| 1. Synthetic and characterization details                                           | ....S2 |
| 2. Thermal analysis of binary mixtures                                              | ....S7 |
| 3. Dielectric data for binary mixtures                                              | ....S7 |
| 4. Details for calculations in the nematic phase                                    | ....S9 |
| 5. Results of Maier-Meier analysis                                                  | ...S11 |
| 6. Dipole moment and polarizability computational results for <b>1</b> and <b>2</b> | ...S14 |
| 7. X-ray crystallography procedure                                                  | ...S15 |
| 8. Structural Data                                                                  | ...S17 |
| 9. Archive files for HF/6-31G(d) calculations                                       | ...S17 |
| 10. References                                                                      | ...S19 |

## 1. Synthetic and characterization details

Reagents and solvents were obtained commercially. Solvents were dried and deoxygenated before use, and reagents were used as supplied.  $\text{ZnCl}_2$  was dried by heating at  $\sim 100^\circ\text{C}$  under vacuum. The concentration of Grignard or organozinc reagents were determined by  $\text{I}_2$  titration.<sup>1</sup> Reactions were carried out under dry Ar, subsequent manipulations conducted in air.

NMR spectra were obtained at 128.4 MHz ( $^{11}\text{B}$ ) and 400.1 MHz ( $^1\text{H}$ ) in  $\text{CD}_3\text{CN}$  or  $\text{CDCl}_3$  unless otherwise specified.  $^1\text{H}$  NMR spectra were referenced to  $\text{CD}_3\text{CN}$  (1.93 ppm) or  $\text{CDCl}_3$  (7.24 ppm).  $^{11}\text{B}$  NMR chemical shifts are relative to the resonance of an external boric acid sample in  $\text{CH}_3\text{OH}$  that was set to 18.1 ppm. IR spectra were recorded in the solid state using an AT-IR accessory. Elemental analysis was provided by Atlantic Microlab, GA.

Thermal analysis was obtained using a TA Instruments 2920 differential scanning calorimeter (DSC). Transition temperatures (onset) and enthalpies were obtained using small samples (0.3-0.6 mg) and a heating rate of  $5\text{ K min}^{-1}$  under a flow of nitrogen gas.

UV spectra were recorded in UV-grade  $\text{CH}_3\text{CN}$ . All compounds were in concentration of  $0.4\text{--}4 \times 10^{-5}\text{ M}$ . Extinction coefficients were obtained by fitting the maximum absorbance against concentration in agreement with Beer's law.

### Preparation of [*closo*-1- $\text{CB}_9\text{H}_8$ -1- $\text{NC}_{12}\text{H}_{23}$ -10- $\text{C}_6\text{H}_{13}$ ] (1)

A mixture of [*closo*-1- $\text{CB}_9\text{H}_8$ -1- $\text{NH}_2$ -10- $\text{C}_6\text{H}_{13}$ ]<sup>-</sup>  $\text{NMe}_4^+$  (**4**[ $\text{NMe}_4$ ], 0.190 g, 0.65 mmol), 3,3-bis(2-bromoethyl)-1-bromooctane<sup>2</sup> (**9**, 0.26 g, 0.65 mmol), 18-crown-6 (0.011 g, 0.042 mmol), and anhydrous  $\text{K}_2\text{CO}_3$  (0.248 g, 1.79 mmol) were refluxed in anhydrous  $\text{CH}_3\text{CN}$  (20 mL) under inert atmosphere for 9 days. The reaction mixture was filtered, washed with  $\text{CH}_2\text{Cl}_2$ ,

and solvents removed giving a semi-crystalline yellow-brown solid. The solid was passed through a short silica-gel plug ( $\text{CH}_2\text{Cl}_2$ ) giving 0.270 g of crude product, which was washed with iso-octane and cold  $\text{CH}_3\text{OH}$  giving 0.130 g of a white residue. The white residue was further purified via column chromatography (hexanes/ $\text{CH}_2\text{Cl}_2$ , 1:2) giving 0.080 g (33% yield) of [*closo*-1- $\text{CB}_9\text{H}_8$ -1- $\text{NC}_{12}\text{H}_{23}$ -10- $\text{C}_6\text{H}_{13}$ ] (**1**) as a white crystalline solid. The final product was further purified by recrystallization (iso-octane/toluene mixture): mp 363 °C dec (DSC);  $^1\text{H}$  NMR ( $\text{CDCl}_3$ )  $\delta$  0.40-2.80 (br m, 8H), 0.80-1.00 (m, 6H), 1.12-1.50 (m, 10H), 1.52-1.70 (m, 4H), 1.81-1.95 (m, 2H) 2.01-2.15 (m, 8H), 4.10-4.30 (m, 6H);  $^{11}\text{B}$  NMR ( $\text{CDCl}_3$ )  $\delta$  -26.4 (d,  $J$  = 141 Hz, 4B), -18.5 (d,  $J$  = 110 Hz, 4B), 46.4 (s, 1B). Anal. Calcd. for  $\text{C}_{19}\text{H}_{44}\text{B}_9\text{N}$ : C, 59.45; H, 11.55; N, 3.65. Found: C, 59.57; H, 11.65; N, 3.78.

#### Preparation of [*closo*-1- $\text{CB}_9\text{H}_8$ -1- $\text{SC}_{10}\text{H}_{20}$ -10- $\text{C}_6\text{H}_{13}$ ] (**2**)

To a three-necked flask under inert atmosphere attached with reflux condenser, a glass stopcock, and septum containing  $\text{Pd}_2\text{dba}_3$  (5 mg, 0.005 mmol) and  $[\text{HPCy}_3]\text{BF}_4$  (8 mg, 0.022 mmol) was added an anhydrous NMP/THF mixture (6 mL, 1:2). A solution  $\text{C}_6\text{H}_{13}\text{ZnCl}$  (3 mL, 2.14 mmol, 0.712 M) [prepared from  $\text{C}_6\text{H}_{13}\text{MgBr}$  (3 mL, 2.14 mmol, 0.712 M) and anhydrous  $\text{ZnCl}_2$  (0.300 g, 2.20 mmol)] was added resulting in the formation of a yellow/orange suspension that slowly turned green. [*closo*-1- $\text{CB}_9\text{H}_8$ -1- $\text{SC}_{10}\text{H}_{20}$ -10-**I**] (**10**, 0.114 g, 0.274 mmol) dissolved in anhydrous THF (2 mL) was added via syringe, the septum replaced with a glass stopcock, and the reaction was stirred at 85 °C. Reaction progress was monitored at 24 hr intervals by  $^{11}\text{B}$  NMR analysis. If the reaction was incomplete, additional equivalents of  $\text{Pd}_2\text{dba}_3$ ,  $[\text{HPCy}_3]\text{BF}_4$ , and  $\text{C}_6\text{H}_{13}\text{ZnCl}$  were added and stirring continued at 85 °C. After 72 hr, the reaction was quenched with a saturated solution of  $\text{NH}_4\text{Cl}$  (10 mL), extracted into  $\text{Et}_2\text{O}$  (3 x

5 mL), dried ( $\text{Na}_2\text{SO}_4$ ) and evaporated. NMP was removed via vacuum distillation (0.5 mm Hg, 50 °C) giving 0.212 g of crude product. The crude product was purified via column chromatography ( $\text{CH}_2\text{Cl}_2$ /hexane, 1:1) giving 0.060 g (58% yield) of [*closo*-1- $\text{CB}_9\text{H}_8$ -1- $\text{SC}_{10}\text{H}_{20}$ -10- $\text{C}_6\text{H}_{13}$ ] (**2**) as a yellowish solid. The final product was further purified by washing with hot hexane and recrystallization (toluene/iso-octane mixture): mp 209 °C (DSC);  $^1\text{H}$  NMR ( $\text{CDCl}_3$ )  $\delta$  0.40-2.80 (br m, 8H), 0.92 (t,  $J = 6.5$  Hz, 6H), 1.33-1.40 (m, 13H), 1.51-1.63 (m, 2H), 1.62-1.80 (m, 2H), 1.85-1.95 (m, 2H), 2.05-2.14 (m, 2H), 2.50 (br d,  $J = 11.6$  Hz, 2H), 3.60-3.72 (m, 2H), 4.07 (br d,  $J = 11.7$  Hz, 2H);  $^{11}\text{B}$  NMR ( $\text{CDCl}_3$ )  $\delta$  -24.5 (d,  $J = 146$  Hz, 4B), -16.2 (d,  $J = 149$  Hz, 4B), 54.1 (s, 1B). Anal. Calcd. for  $\text{C}_{17}\text{H}_{41}\text{B}_9\text{S}$ : C, 54.47; H, 11.02. Found: C, 54.69; H, 11.17.

#### Preparation of [*closo*-1- $\text{CB}_9\text{H}_8$ -1- $\text{NH}_2$ -10- $\text{C}_6\text{H}_{13}$ ] $\text{NMe}_4^+$ (**4**[ $\text{NMe}_4$ ])

To a three-necked flask under inert atmosphere attached with reflux condenser, a glass stopcock, and septum containing iodo amine<sup>3</sup> [*closo*-1- $\text{CB}_9\text{H}_8$ -1- $\text{NH}_2$ -10- $\text{I}$ ]  $\text{NHMe}_3^+$  (**3**[ $\text{NHMe}_3$ ], 0.635 g, 1.98 mmol) [ $^{11}\text{B}$  NMR ( $\text{CD}_3\text{CN}$ )  $\delta$  -22.0 (d,  $J = 144$  Hz, 4B), -16.3 (d,  $J = 157$  Hz, 4B), 10.8 (1B)] dissolved in anhydrous THF (20 mL) was added  $\text{C}_6\text{H}_{13}\text{MgBr}$  (9.9 mL, 19.8 mmol, 2.0 M). A bubbler was attached, and the reaction mixture was heated at reflux for 30 min.  $(\text{PPh}_3)_2\text{PdCl}_2$  (0.186 g, 0.26 mmol) and  $\text{CuI}$  (0.075 g, 0.393 mmol) were added, and the reaction was stirred at reflux, and reaction progress was monitored by  $^{11}\text{B}$  NMR at 24 hr intervals. If the reaction was incomplete, additional equivalents of  $\text{C}_6\text{H}_{13}\text{MgBr}$ ,  $(\text{PPh}_3)_2\text{PdCl}_2$ , and  $\text{CuI}$  were added and heating continued. A 5%  $\text{HCl}$  solution (200 mL) was added, and the reaction mixture was extracted with  $\text{Et}_2\text{O}$  (3 x 50 mL). The organic layers were combined, dried ( $\text{Na}_2\text{SO}_4$ ), filtered, and evaporated giving 1.60 g of an oily brown residue. The residue

was purified by column chromatography (CH<sub>3</sub>CN/CH<sub>2</sub>Cl<sub>2</sub>, 1:4) giving 0.140 g of crude acid extract [*closo*-1-CB<sub>9</sub>H<sub>8</sub>-1-NH<sub>2</sub>-10-C<sub>6</sub>H<sub>13</sub>]<sup>-</sup> H<sub>3</sub>O<sup>+</sup> [<sup>11</sup>B {<sup>1</sup>H} NMR (CD<sub>3</sub>CN) δ -26.5 (4B), -18.1 (4B), 39.4 (1B)]. Water (5 mL) and NMe<sub>4</sub><sup>+</sup> OH<sup>-</sup> · 5H<sub>2</sub>O (0.109 g, 0.60 mmol) were added producing a milky suspension. Solvents were removed to dryness *in vacuo* giving 0.190 g (33% yield) of [*closo*-1-CB<sub>9</sub>H<sub>8</sub>-1-NH<sub>2</sub>-10-C<sub>6</sub>H<sub>13</sub>]<sup>-</sup> NMe<sub>4</sub><sup>+</sup> (**4**[NMe<sub>4</sub>]) as a colorless film that slowly crystallized: <sup>1</sup>H NMR (CD<sub>3</sub>CN) δ 0.40-2.80 (br m, 8H), 0.91 (t, *J* = 7.0 Hz, 3H), 1.30-1.40 (m, 4H), 1.45-1.59 (m, 2H), 1.73-1.83 (m, 4H), 3.08 (s, 12H); <sup>11</sup>B {<sup>1</sup>H} NMR δ -26.5 (4B), -18.2 (4B), 36.2 (1B); MS (FAB): *m/z* (216-220) max at 219 (100 %); FAB-HRMS(-): Calcd. for C<sub>8</sub>H<sub>22</sub>B<sub>9</sub>O<sub>2</sub> *m/z*: 220.2668; found; 220.2670.

#### Identification of [*closo*-1-CB<sub>9</sub>H<sub>8</sub>-1-NH<sub>2</sub>-10-PPh<sub>3</sub>] (**5**).

Crude phosphonium adduct **5** (158 mg, 20% yield) of was isolated by column chromatography (CH<sub>3</sub>CN/CH<sub>2</sub>Cl<sub>2</sub>, 1:9) during the purification of amine **4** as a slight yellow residue. An analytical sample was prepared by washing crude **5** with hot hexane, hot ethanol, and then recrystallized (cold toluene/CH<sub>3</sub>CN mixture): mp 300 °C (DSC); <sup>1</sup>H NMR (CD<sub>3</sub>CN) δ 7.57-7.65 (m, 6H), 7.69-7.76 (m, 3H), 7.78-7.88 (m, 6H); <sup>11</sup>B NMR (CD<sub>3</sub>CN) δ -20.6 (d, *J* = 144 Hz, 4B), -14.5 (d, *J* = 154 Hz, 4B), 15.6 (d, *J* = 196 Hz, 1B); <sup>31</sup>P NMR (CD<sub>3</sub>CN) δ 9.7 (q, *J* = 196 Hz); MS (FAB): *m/z* 393-398 (max at 396, 100%); FAB-HRMS(+): Calcd. for C<sub>19</sub>H<sub>25</sub>B<sub>9</sub>NP *m/z*: 397.2562; found; 397.2542. Anal. Calcd. for C<sub>19</sub>H<sub>25</sub>B<sub>9</sub>NP: C, 57.67; H, 6.37; N, 3.54. Found: C, 56.87; H, 6.19; N, 3.33.

#### Preparation of [*closo*-1-CB<sub>9</sub>H<sub>8</sub>-1-SCHN(Me)<sub>2</sub>-10-I] (**8**)

A yellow solution of [*closo*-1-CB<sub>9</sub>H<sub>8</sub>-1-N<sub>2</sub>-10-I]<sup>3</sup> (**7**, 0.200 g, 0.74 mmol) and freshly distilled Me<sub>2</sub>NCHS (3.0 mL) was stirred at rt for 6 hr. Excess Me<sub>2</sub>NCHS was removed by vacuum distillation (80 °C, 0.25 mm Hg) leaving 0.296 g of crude product as a slight yellow oil that slowly crystallized. The crude product was washed with toluene until the decant was no longer yellow giving 0.245 g (100% yield) of crude [*closo*-1-CB<sub>9</sub>H<sub>9</sub>-1-SCHN(Me)<sub>2</sub>-10-I] (**8**) as yellowish solid: <sup>1</sup>H NMR (CD<sub>3</sub>CN) (major signals) δ 3.46 (s, 3H), 3.65 (s, 3H), 9.74 (s, 1H), (minor signals attributed to Me<sub>2</sub>NCHS) δ 3.19 (s, 3H), 3.25 (s, 3H), 9.14 (s, 1H); <sup>11</sup>B NMR (CD<sub>3</sub>CN) δ -19.6 (d, *J* = 146 Hz, 4B), -13.9 (d, *J* = 156 Hz, 4B), 20.0 (s, 1B); MS (FAB): *m/z* (331-335) max at 333 (100 %); FAB-HRMS(+): Calcd. for C<sub>4</sub>H<sub>14</sub>B<sub>9</sub>INS *m/z*: 334.0729; found; 334.0731.

#### Preparation of [*closo*-1-CB<sub>9</sub>H<sub>8</sub>-1-SC<sub>10</sub>H<sub>20</sub>-10-I] (**10**)

A yellow solution of crude [*closo*-1-CB<sub>9</sub>H<sub>8</sub>-1-SCHN(Me)<sub>2</sub>-10-I] (**8**, 0.245 g, 0.74 mmol), NMe<sub>4</sub><sup>+</sup> OH<sup>-</sup> · 5H<sub>2</sub>O (0.145 g, 0.80 mmol), and 1-bromo-3-(2-bromoethyl)octane<sup>4</sup> (0.220 g, 0.74 mmol) in anhydrous CH<sub>3</sub>CN (5 mL) was stirred at rt for 12 hr. The reaction mixture was filtered and evaporated to dryness. The resulting residue was washed with hexane giving 0.43 g of crude product. The crude product was passed through a short silica gel plug (CH<sub>2</sub>Cl<sub>2</sub>/hexane, 1:1) giving 0.120 g (39% yield based on **7**) of [*closo*-1-CB<sub>9</sub>H<sub>8</sub>-1-SC<sub>10</sub>H<sub>20</sub>-10-I] (**10**) as the fast-moving component, which was further purified by recrystallization (toluene/iso-octane mixture): mp 230 °C; <sup>1</sup>H NMR (CD<sub>3</sub>CN) δ 0.40-2.80 (br m, 8H), 0.90 (t, *J* = 6.9 Hz, 3H), 1.31-1.35 (m, 8H), 1.71-1.76 (m, 3H), 2.41 (m, 2H), 3.66 (t, *J* = 11.8 Hz, 2H), 4.13 (d, *J* = 11.1 Hz, 2H); <sup>11</sup>B NMR (CD<sub>3</sub>CN) δ -19.8 (d, *J* = 152 Hz, 4B), -15.0 (d, *J* = 164 Hz, 4B), 23.2 (s, 1B). Anal. Calcd. for C<sub>11</sub>H<sub>28</sub>B<sub>9</sub>IS: C, 31.71; H, 6.77. Found: C, 31.69; H, 6.86.

## 2. Thermal analysis of binary mixtures

**Table S1.**  $T_{NI}$  for solutions of **1** in ClEster.

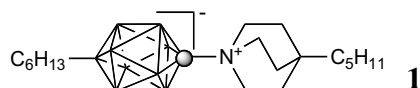

| $T_{NI}$ | mole fraction, $x$ |        |        |        |        |        |        |
|----------|--------------------|--------|--------|--------|--------|--------|--------|
|          | 0.00(host)         | 0.0152 | 0.0270 | 0.0332 | 0.0421 | 0.0491 | 0.0603 |
| onset    | 47.3               | 48.8   | 49.7   | 50.2   | 51.25  | 51.8   | 52.6   |
| peak     | 47.8               | 49.1   | 50.1   | 50.7   | 51.8   | 52.4   | 53.2   |

**Table S2.**  $T_{NI}$  for solutions of **2** in ClEster.

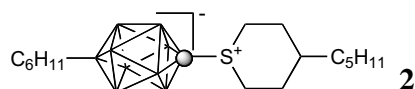

| $T_{NI}$ | mole fraction, $x$ |        |        |        |        |        |
|----------|--------------------|--------|--------|--------|--------|--------|
|          | 0.00(host)         | 0.0246 | 0.0359 | 0.0538 | 0.0857 | 0.0949 |
| onset    | 47.3               | na     | 47.0   | 47.4   | 48.9   | 50.7   |
| peak     | 47.8               | na     | 47.7   | 48.4   | 50.5   | 51.9   |

## 3. Dielectric data for binary mixtures

Dielectric parameters in Tables S3 and S4 for low concentration solutions of additives **1** and **2** in ClEster were obtained by averaging 5-10 measurements of each solution in 2 cells. Standard deviation of the resulting values typically is  $\leq \pm 0.02$ . All measurements were run at 25 °C. Error on concentration values  $\sim 1.5\%$ .

**Table S3.** Dielectric parameters for solutions of **1** in ClEster at 25 °C.

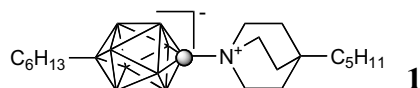

| parameter          | mole fraction, $x$ |                  |                  |                  |                  |                 |                 |
|--------------------|--------------------|------------------|------------------|------------------|------------------|-----------------|-----------------|
|                    | 0.00(host)         | 0.0152           | 0.0270           | 0.0332           | 0.0421           | 0.0491          | 0.0603          |
| $\epsilon_{  }$    | 2.63 $\pm$ 0.01    | 3.625 $\pm$ 0.06 | 4.07 $\pm$ 0.005 | 4.25 $\pm$ 0.01  | 4.41 $\pm$ 0.0   | 4.55 $\pm$ 0.02 | 4.78 $\pm$ 0.01 |
| $\epsilon_{\perp}$ | 3.22 $\pm$ 0.01    | 3.38 $\pm$ 0.01  | 3.45 $\pm$ 0.00  | 3.49 $\pm$ 0.004 | 3.49 $\pm$ 0.015 | 3.52 $\pm$ 0.01 | 3.57 $\pm$ 0.01 |
| $\Delta\epsilon$   | -0.59 $\pm$ 0.01   | 0.24 $\pm$ 0.06  | 0.63 $\pm$ 0.006 | 0.76 $\pm$ 0.01  | 0.93 $\pm$ 0.02  | 1.03 $\pm$ 0.01 | 1.21 $\pm$ 0.01 |

**Table S4.** Dielectric parameters for solutions of **2** in ClEster at 25 °C.

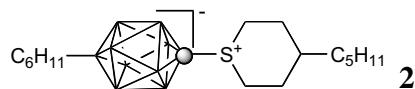

| parameter          | mole fraction, $x$ |           |           |           |           |           |
|--------------------|--------------------|-----------|-----------|-----------|-----------|-----------|
|                    | 0.00(host)         | 0.0246    | 0.0359    | 0.0538    | 0.0857    | 0.0949    |
| $\epsilon_{  }$    | 2.63±0.01          | 4.13±0.05 | 4.54±0.04 | 4.99±0.01 | 5.68±0.04 | 5.87±0.04 |
| $\epsilon_{\perp}$ | 3.22±0.01          | 3.60±0.01 | 3.67±0.03 | 3.81±0.01 | 4.01±0.02 | 4.00±0.02 |
| $\Delta\epsilon$   | -0.59±0.01         | 0.53±0.05 | 0.87±0.04 | 1.17±0.01 | 1.67±0.02 | 1.87±0.02 |

Using equations 1-3, dielectric parameters for each solution were extrapolated to the pure additive:

$$\Delta\epsilon = x\Delta\epsilon_a + (1-x)\Delta\epsilon_{host} \quad \text{equation 1}$$

$$\epsilon_{||} = x\epsilon_{||a} + (1-x)\epsilon_{||host} \quad \text{equation 2}$$

$$\epsilon_{\perp} = x\epsilon_{\perp a} + (1-x)\epsilon_{\perp host} \quad \text{equation 3}$$

in which the subscript  $a$  denotes the additive and  $x$  its mole fraction. The resulting datapoints were fitted to a second order polynomial (see Figure 8 in the text).

**Table S5.** Extrapolated dielectric parameters for **1** at 25 °C.

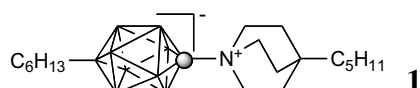

| extrapolated<br>parameter | mole fraction, $x$ |          |          |          |          |          |
|---------------------------|--------------------|----------|----------|----------|----------|----------|
|                           | 0.0152             | 0.0270   | 0.0332   | 0.0421   | 0.0491   | 0.0603   |
| $\epsilon_{  }$           | 68.1±4.0           | 56.0±0.1 | 51.4±0.3 | 44.9±0.1 | 41.7±0.4 | 38.3±0.2 |
| $\epsilon_{\perp}$        | 13.9±0.6           | 11.7±0.1 | 11.4±0.1 | 9.6±0.4  | 9.3±0.2  | 9.0±0.2  |
| $\Delta\epsilon$          | 54.2±4.0           | 44.6±0.2 | 40.1±0.3 | 35.5±0.5 | 32.4±0.2 | 29.3±0.2 |

Best fit functions:

$$\epsilon_{||} = 10552x^2 - 1458x + 88 \pm 1 ; r^2 = 0.999$$

$$\epsilon_{\perp} = 2082x^2 - 269x + 17.5 \pm 1 ; r^2 = 0.980$$

$$\Delta\epsilon = 8134x^2 - 1166x + 70 \pm 0.5 ; r^2 = 0.999$$

$$\epsilon_{||} = 3.74 \pm 0.1 / (x - 0.0399 \pm 0.002) ; r^2 = 0.997$$

$$\epsilon_{\perp} = 1.02 \pm 0.1 / (x - 0.0586 \pm 0.008) ; r^2 = 0.965$$

$$\Delta\epsilon = 2.80 \pm 0.05 / (x - 0.0363 \pm 0.001) ; r^2 = 0.999$$



**Table S6.** Extrapolated dielectric parameters for **2** at 25 °C.

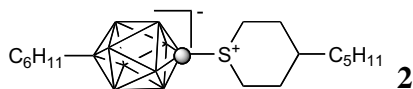

| extrapolated<br>parameter | mole fraction, $x$ |          |          |          |          |
|---------------------------|--------------------|----------|----------|----------|----------|
|                           | 0.0246             | 0.0359   | 0.0538   | 0.0857   | 0.0949   |
| $\epsilon_{  }$           | 63.6±2.0           | 55.8±1.1 | 46.5±0.2 | 38.2±0.5 | 36.8±0.4 |
| $\epsilon_{\perp}$        | 18.7±0.4           | 15.8±0.8 | 14.2±0.2 | 12.4±0.2 | 11.4±0.2 |
| $\Delta\epsilon$          | 44.9±2.0           | 40.1±1.1 | 32.1±0.2 | 25.8±0.3 | 25.3±0.2 |

Best fit functions:

$$\epsilon_{||} = 4914x^2 - 962x + 84 \pm 1; r^2 = 0.999$$

$$\epsilon_{\perp} = 1260x^2 - 244x + 23.5 \pm 2; r^2 = 0.973$$

$$\Delta\epsilon = 3737x^2 - 730x + 61 \pm 1.5; r^2 = 0.998$$

$$\epsilon_{||} = 5.86 \pm 0.3 / (x - 0.0685 \pm 0.006); r^2 = 0.993$$

$$\epsilon_{\perp} = 2.15 \pm 0.25 / (x - 0.0941 \pm 0.016); r^2 = 0.964$$

$$\Delta\epsilon = 3.77 \pm 0.23 / (x - 0.0595 \pm 0.006); r^2 = 0.992$$

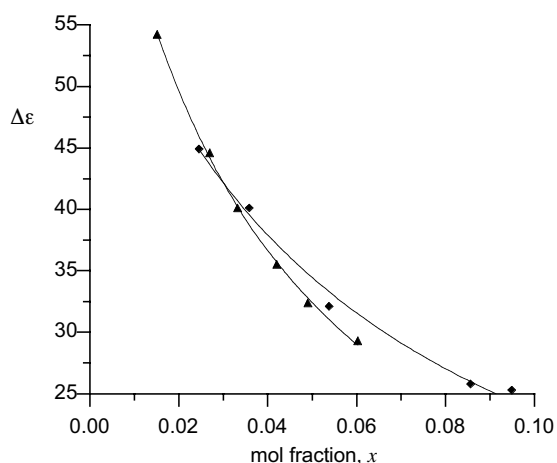

**Figure S1.** Extrapolated  $\Delta\epsilon$  vs concentration of **1** (triangles) and **2** (diamonds) in **CI Ester** fitted to a hyperbolic function.

#### 4. Details for calculations in the nematic phase

The Equations derived from the Maier-Meier theory used in this work were adopted from literature<sup>5,6</sup> and had the following form:

$$\Delta\epsilon = \frac{NFh}{\epsilon_0} \left\{ \Delta\alpha - \frac{F\mu_{eff}^2}{2k_B T} (1 - 3\cos^2 \beta) \right\} S$$

equation 4

$$\epsilon_{\parallel} = 1 + \frac{NFh}{\epsilon_0} \left\{ \bar{\alpha} + \frac{2}{3} \Delta\alpha S + \frac{F\mu_{eff}^2}{3k_B T} \left[ 1 - (1 - 3\cos^2 \beta) S \right] \right\}$$

equation 5

$$\epsilon_{\perp} = 1 + \frac{NFh}{\epsilon_0} \left\{ \bar{\alpha} - \frac{1}{3} \Delta\alpha S + \frac{F\mu_{eff}^2}{3k_B T} \left[ 1 + \frac{1}{2} (1 - 3\cos^2 \beta) S \right] \right\}$$

equation 6

All quantities were in SI units.

- Dielectric permittivity of vacuum:

$$\epsilon_0 = 1.114 \times 10^{-10} / 4\pi = 8.865 \times 10^{-12} \text{ F}\cdot\text{m}^{-1}.$$

- The matrix of electronic polarizabilities  $\alpha$  in a.u. units listed in the output file for each molecule was diagonalized. The resulting principal values were converted to  $\text{F}\cdot\text{m}^2$  units by multiplying with  $1.482 \times 4\pi\epsilon_0 \times 10^{-31} = 1.651 \times 10^{-41}$ .

- Computed dipole moments  $\mu$  in Debye were converted to dipole moments in  $\text{C}\cdot\text{m}$  units using the conversion  $1\text{D} = 3.3356 \times 10^{-30} \text{ C}\cdot\text{m}$ .

- Number density  $N$  used in all calculations was obtained for each **1** and **2** assuming density of the liquid to be  $1000 \text{ kg}\cdot\text{m}^{-3}$ , and expressed in molecules per  $\text{m}^3$ .

- For calculations involving the extrapolated dielectric parameters for each compound, reaction field factors  $F$  and  $h$  were calculated for the pure host **CI Ester** using literature<sup>5</sup> values for mean  $\bar{\alpha} = 53.8 \times 10^{-24} \text{ cm}^3$  (or  $5.99 \times 10^{-39} \text{ Cm}^2\text{V}^{-1}$ ) and experimental average permittivity  $\epsilon = 3.03$  taken as  $\epsilon_s$ . The density was taken as  $1.02 \text{ g cm}^{-3}$ .<sup>5</sup> Thus, reaction field parameters  $F = 1.2090$  and  $h = 1.2875$  were obtained for **CI Ester** using the following equations:

$$F = \frac{1}{1 - \bar{\alpha} \cdot f} \quad \text{where} \quad f = \frac{2(\bar{\epsilon}_s - 1)}{2\bar{\epsilon}_s + 1} \cdot \frac{N}{3\epsilon_0} \quad \text{and} \quad h = \frac{3\epsilon_s}{(2\bar{\epsilon}_s + 1)}$$

Static permittivity  $\epsilon_s$  was assumed to be average dielectric permittivity calculated from  $\epsilon_{\parallel}$  and  $\epsilon_{\perp}$ .

## 5. Results of Maier-Meier analysis.

The order parameter  $S$  and the Kirkwood factor  $g$  for the zwitterionic additives were obtained by solving simultaneously equations for  $\Delta\epsilon$  and  $\epsilon_{||}$  (equations 4 and 5). The unknown  $g$  from the expression for  $\Delta\epsilon$  (equation 4) was substituted into the expression for  $\epsilon_{||}$  (equation 5) and solved for  $S$  (equation 7). In this form, order parameter  $S$  does not depend on the dipole moment  $\mu$ , but depends on the dielectric permittivity components  $\epsilon_{||}$  and  $\epsilon_{\perp}$ . The obtained value  $S$  was substituted to the expression for parameter  $g$  (equation 8).

$$S = \frac{\Delta\epsilon\epsilon_0}{\Delta\alpha NFh + (1 - 3\cos^2\beta)\left[\Delta\epsilon\epsilon_0 - \frac{3}{2}(\epsilon_{||}\epsilon_0 - \epsilon_0 - \bar{\alpha}NFh)\right]} \quad \text{equation 7}$$

$$g = \frac{2(\Delta\alpha NFhS - \Delta\epsilon\epsilon_0)k_B T}{NF^2 h \mu^2 (1 - 3\cos^2\beta)S} \quad \text{equation 8}$$

The protocol was verified by substituting the computed parameters  $S$  and  $g$  into equations 4-6 and calculating back the dielectric parameters.

Molarity of solutions of **1** and **2** was calculated using the literature<sup>5</sup> value for the density of the host ( $1.02 \text{ g cm}^{-3}$ ) and it was used to derive the equilibrium constant  $K$  using equation 9:

$$g = \frac{\sqrt{8Kc + 1} - 1}{4Kc} \quad \text{equation 9}$$

**Table S7.** Calculated apparent order parameter  $S_{app}$  and Kirkwood constant  $g$  for solutions of **1** in **ClEster** at 25 °C.

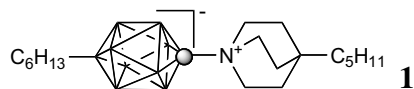

| parameter | mole fraction, $x$                                                                                    |        |        |        |        |        |
|-----------|-------------------------------------------------------------------------------------------------------|--------|--------|--------|--------|--------|
|           | 0.0152                                                                                                | 0.0270 | 0.0332 | 0.0421 | 0.0491 | 0.0603 |
|           | concentration, $c / \text{molL}^{-1}$                                                                 |        |        |        |        |        |
|           | 0.0337                                                                                                | 0.0600 | 0.0739 | 0.0937 | 0.1096 | 0.1348 |
|           | Using dipole moment $\mu$ calculated for $\epsilon = 1$                                               |        |        |        |        |        |
| $S_{app}$ | 0.64                                                                                                  | 0.645  | 0.62   | 0.64   | 0.63   | 0.62   |
| $g$       | 0.380                                                                                                 | 0.310  | 0.287  | 0.244  | 0.228  | 0.211  |
|           | Using dipole moment $\mu$ calculated for $\epsilon = 3.03$ (host medium)                              |        |        |        |        |        |
| $S_{app}$ | 0.64                                                                                                  | 0.64   | 0.63   | 0.65   | 0.64   | 0.62   |
| $g$       | 0.301                                                                                                 | 0.245  | 0.227  | 0.193  | 0.180  | 0.167  |
|           | Using dipole moment $\mu$ calculated for $\epsilon$ of each solution                                  |        |        |        |        |        |
| $S_{app}$ | 0.64                                                                                                  | 0.65   | 0.63   | 0.65   | 0.64   | 0.63   |
| $g$       | 0.294                                                                                                 | 0.235  | 0.216  | 0.183  | 0.170  | 0.155  |
|           | Using dipole moment $\mu$ and field parameters $F$ and $h$ calculated for $\epsilon$ of each solution |        |        |        |        |        |
| $S_{app}$ | 0.65                                                                                                  | 0.65   | 0.63   | 0.65   | 0.64   | 0.63   |
| $g$       | 0.279                                                                                                 | 0.218  | 0.199  | 0.167  | 0.154  | 0.140  |

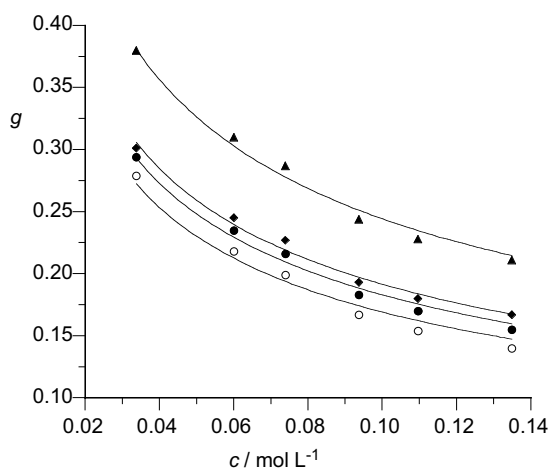

**Figure S2.** A plot of  $g$  values (Table S7) calculated for different concentration of **1** in **ClEster** using model 1 (triangles), model 2 (diamonds), model 3 (filled circles), and model 4 (open circles). Equation 9 is the fitting function.

**Table S8.** Calculated apparent order parameter  $S_{app}$  and Kirkwood constant  $g$  for solutions of **2** in **ClEster** at 25 °C.

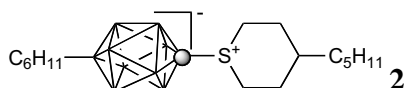

| parameter | mole fraction, $x$                                                                                    |        |        |        |        |
|-----------|-------------------------------------------------------------------------------------------------------|--------|--------|--------|--------|
|           | 0.0246                                                                                                | 0.0359 | 0.0538 | 0.0857 | 0.0949 |
|           | concentration, $c / \text{molL}^{-1}$                                                                 |        |        |        |        |
|           | 0.0521                                                                                                | 0.0746 | 0.1084 | 0.1641 | 0.1791 |
|           | Using dipole moment $\mu$ calculated for $\epsilon = 1$                                               |        |        |        |        |
| $S_{app}$ | 0.50                                                                                                  | 0.52   | 0.49   | 0.48   | 0.50   |
| $g$       | 0.423                                                                                                 | 0.362  | 0.305  | 0.252  | 0.236  |
|           | Using dipole moment $\mu$ calculated for $\epsilon = 3.03$ (host medium)                              |        |        |        |        |
| $S_{app}$ | 0.50                                                                                                  | 0.52   | 0.50   | 0.48   | 0.51   |
| $g$       | 0.339                                                                                                 | 0.290  | 0.244  | 0.201  | 0.189  |
|           | Using dipole moment $\mu$ calculated for $\epsilon$ of each solution                                  |        |        |        |        |
| $S_{app}$ | 0.51                                                                                                  | 0.53   | 0.50   | 0.49   | 0.51   |
| $g$       | 0.324                                                                                                 | 0.273  | 0.226  | 0.181  | 0.169  |
|           | Using dipole moment $\mu$ and field parameters $F$ and $h$ calculated for $\epsilon$ of each solution |        |        |        |        |
| $S_{app}$ | 0.51                                                                                                  | 0.53   | 0.51   | 0.49   | 0.52   |
| $G$       | 0.297                                                                                                 | 0.246  | 0.200  | 0.155  | 0.144  |

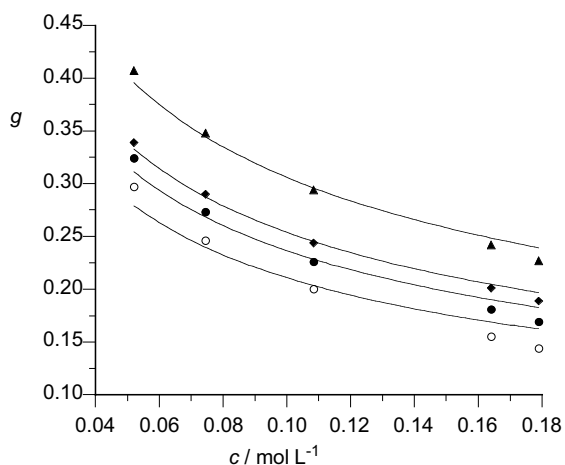

**Figure S3.** A plot of  $g$  values (Table S8) calculated for different concentration of **2** in **ClEster** using model 1 (triangles), model 2 (diamonds), model 3 (filled circles), and model 4 (open circles). Equation 9 is the fitting function.

## 6. Dipole moment and polarizability computational results for 1 and 2.

In all these calculations long molecular axes are oriented along the x axes.

Dipole Moments (D) at the HF/6-31G\* level of theory (full geometry optimization)

### Quinuclidinium 1

|                               |            |           |           |              |
|-------------------------------|------------|-----------|-----------|--------------|
| gas phase, $\epsilon = 1.0$ : | X= 15.8566 | Y= 2.8579 | Z= 0.0110 | Tot= 16.1121 |
| IPCM, $\epsilon = 2.84$ :     | X= 17.6353 | Y= 3.5504 | Z= 0.2557 | Tot= 17.9910 |
| IPCM, $\epsilon = 3.03$ :     | X= 17.7648 | Y= 3.6423 | Z= 0.2757 | Tot= 18.1364 |
| IPCM, $\epsilon = 4.00$ :     | X= 18.1664 | Y= 3.7948 | Z= 0.3527 | Tot= 18.5618 |

Linear dependence on dielectric permittivity for 1

$$\mu_x(\epsilon) = 0.802\epsilon + 15.18 \quad (r^2 = 0.962)$$

$$\mu_y(\epsilon) = 0.325\epsilon + 2.58 \quad (r^2 = 0.966)$$

$$\mu_z(\epsilon) = 0.125\epsilon - 0.12 \quad (r^2 = 0.977)$$

### Sulfonium 2

|                               |            |           |           |              |
|-------------------------------|------------|-----------|-----------|--------------|
| gas phase, $\epsilon = 1.0$ : | X= 15.2675 | Y= 1.1938 | Z= 2.3588 | Tot= 15.4947 |
| IPCM, $\epsilon = 2.84$ :     | X= 16.8698 | Y= 1.5756 | Z= 2.9909 | Tot= 17.2052 |
| IPCM, $\epsilon = 3.03$ :     | X= 16.9800 | Y= 1.6108 | Z= 3.0326 | Tot= 17.3238 |
| IPCM, $\epsilon = 4.62$ :     | X= 17.7271 | Y= 1.9005 | Z= 3.3396 | Tot= 18.1388 |

Linear dependence on dielectric permittivity for 2

$$\mu_x(\epsilon) = 0.686\epsilon + 14.74 \quad (r^2 = 0.964)$$

$$\mu_y(\epsilon) = 0.196\epsilon + 1.01 \quad (r^2 = 0.998)$$

$$\mu_z(\epsilon) = 0.273\epsilon + 2.15 \quad (r^2 = 0.968)$$

Electronic polarizabilities (au) at the B3LYP/3-21G level of theory (full geometry optimization)  $1\text{\AA}^3 = 0.1482 \text{ au}$

### Quinuclidinium 1

Exact polarizability: 411.848 5.503 246.545 -0.329 -0.162 239.097  
Diagonalized: 412.0, 246.4, 239.1

### Sulfonium 2

Exact polarizability: 418.344 2.546 242.140 7.870 4.595 246.833  
Diagonalized: 418.7, 249.3 239.3

## 7. X-ray crystallography procedures

A colorless crystal (approximate dimensions 0.020 x 0.010 x 0.005 mm<sup>3</sup>) was placed onto the tip of ultra thin glass fiber and mounted on a SMART Platform 3-circle diffractometer equipped with a SMART6000 (Bruker) detector and measured at 95(2) K.

### Data collection

The data collection was carried out using synchrotron radiation ( $\lambda = 0.49595$ , double-diamond 111 monochromators, two mirrors to exclude higher harmonics) with a frame time of 1 second and a detector distance of 5.0 cm. A randomly oriented region of reciprocal space was surveyed to the extent of 2.0 hemispheres. Two major sections of frames were collected with 0.30° steps in  $\omega$  and  $\phi$  with a detector position of 0° in  $2\theta$ . Data to a resolution of 0.84 Å were considered in the reduction. Final cell constants were calculated from 2742 strong reflections from the actual data collection after integration (SAINT).<sup>7</sup> The intensity data were corrected for absorption (SADABS).<sup>8</sup>

### Structure solution and refinement

The space group P-1 was determined based on intensity statistics and systematic absences. The structure was solved using SHELXS-97<sup>9</sup> and refined with SHELXL-97.<sup>10</sup> A direct-methods solution was calculated, which provided most non-hydrogen atoms from the E-map. Full-matrix least squares / difference Fourier cycles were performed, which located the remaining non-hydrogen atoms. All non-hydrogen atoms were refined with anisotropic displacement parameters. The hydrogen atoms were placed in ideal positions and refined as riding atoms with individual relative isotropic displacement parameters. The final full matrix least squares refinement converged to  $R1 = 0.0641$  and  $wR2 = 0.1859$  ( $F^2$ , all data). The remaining electron density is located.

**Table S9.** Crystallographic Data for **1**.

|                                   |                                                                                                                                              |
|-----------------------------------|----------------------------------------------------------------------------------------------------------------------------------------------|
| chemical formula                  | C <sub>19</sub> H <sub>44</sub> B <sub>9</sub> N                                                                                             |
| formula weight                    | 383.84                                                                                                                                       |
| crystal color, shape, size        | colorless plate, 0.020 x 0.010 x 0.005 mm <sup>3</sup>                                                                                       |
| temperature,                      | 95(2) K                                                                                                                                      |
| wavelength, $\lambda$             | 0.49595 Å                                                                                                                                    |
| system, space group               | triclinic, P-1                                                                                                                               |
| Unit cell dimensions              |                                                                                                                                              |
| <i>a</i>                          | 9.766(2) Å                                                                                                                                   |
| <i>b</i>                          | 10.481(3) Å                                                                                                                                  |
| <i>c</i>                          | 12.098(3) Å                                                                                                                                  |
| $\alpha$                          | 93.804(9)°                                                                                                                                   |
| $\beta$                           | 90.249(10)°                                                                                                                                  |
| $\gamma$                          | 102.587(10)°                                                                                                                                 |
| volume                            | 1205.7(5) Å <sup>3</sup>                                                                                                                     |
| <i>Z</i>                          | 2                                                                                                                                            |
| Density (D <sub>calcd</sub> )     | 1.057 Mg/m <sup>3</sup>                                                                                                                      |
| Absorption coefficient $\mu$      | 0.013 mm <sup>-1</sup>                                                                                                                       |
| F(000)                            | 420                                                                                                                                          |
| Theta range for data collection   | 2.91 to 17.46°.                                                                                                                              |
| Index ranges                      | -11 ≤ <i>h</i> ≤ 11, -12 ≤ <i>k</i> ≤ 12, 0 ≤ <i>l</i> ≤ 14                                                                                  |
| Reflections collected             | 18929                                                                                                                                        |
| Independent reflections           | 4348 [R(int) = 0.0645]                                                                                                                       |
| Observed Reflections              | 3664                                                                                                                                         |
| Completeness to theta = 17.46°    | 97.0 %                                                                                                                                       |
| Solution and Refinement           |                                                                                                                                              |
| Absorption correction             | Multi-scan                                                                                                                                   |
| Max. and min. transmission        | 0.99 and 0.98                                                                                                                                |
| Solution                          | Direct methods                                                                                                                               |
| Refinement method                 | Full-matrix least-squares on F <sup>2</sup>                                                                                                  |
| Weighting scheme                  | w = [ $\sigma^2 F_o^2 + AP^2 + BP$ ] <sup>-1</sup> , with<br>P = (F <sub>o</sub> <sup>2</sup> + 2 F <sub>c</sub> <sup>2</sup> )/3, A = , B = |
| Data / restraints / parameters    | 4348 / 0 / 264                                                                                                                               |
| Goodness-of-fit on F <sup>2</sup> | 1.079                                                                                                                                        |
| Final R indices [I > 2σ(I)]       | R1 = 0.0641, wR2 = 0.1789                                                                                                                    |
| R indices (all data)              | R1 = 0.0747, wR2 = 0.1859                                                                                                                    |
| Largest diff. peak and hole       | 0.360 and -0.298 e.Å <sup>-3</sup>                                                                                                           |



## 8. Structural Data

**Table S10.** Selected Experimental and Calculated Selected Bond Lengths and Angles for **1** and **2**.

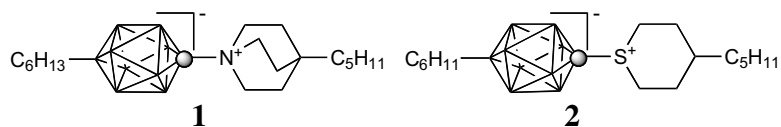

| Distances / Å                                                        | <b>1</b> (C <sub>1</sub> ) |             | <b>2</b> (C <sub>1</sub> ) |
|----------------------------------------------------------------------|----------------------------|-------------|----------------------------|
|                                                                      | Experimental               | HF/6-31G(d) | HF/6-31G(d)                |
| C <sub>cage</sub> -X                                                 | 1.505(2)                   | 1.498       | 1.761                      |
| B(10)-C <sub>alk</sub>                                               | 1.593(3)                   | 1.601       | 1.601                      |
| B-C <sub>cage</sub> (avrg)                                           | 1.619(3)                   | 1.615       | 1.611                      |
| B-B(10) (avrg)                                                       | 1.715                      | 1.713       | 1.715                      |
| C-X (avrg)                                                           | 1.525                      | 1.508       | 1.816                      |
| B...C <sup>a</sup>                                                   | 7.70                       | 7.57        | 7.99                       |
| Angles / °                                                           |                            |             |                            |
| B-C(1)-B (avrg)                                                      | 70.0                       | 70.2        | 70.9                       |
| C <sub>β</sub> -C <sub>α</sub> -B(10)-B                              | 56.1(2)                    | 51.7        | 48.5                       |
| C-X-C <sub>cage</sub> -B                                             | 8.6(2)                     | 0.1         | 52.1                       |
| C <sub>β</sub> -C <sub>α</sub> -C <sub>ring</sub> -C <sub>ring</sub> | 172.1(2)                   | 173.4       | 171.1                      |
| chain-chain <sup>b</sup>                                             | 11                         | 23          | 41                         |

<sup>a</sup> Length of the molecular rigid core. <sup>b</sup> Interplanar angle defined by the first three carbon atoms in each aliphatic chain.

## 9. Archive files for HF/6-31G(d) calculations

### 1

```
1\1\GINC-MONSTER\FOpt\RHF\6-31G(d)\C19H44B9N1\PIOTR\08-Jan-2006\0\#P
HF/6-31G* FOPT GEOM(NOANGLE, NODISTANCE) FCHECK\10-hexyl-1-(4-Pentyl-
Quin-1-yl)-CB9, C1\0,1\B,0.1573509052,2.8774838432,0.2110562481\B,1.1
296774315,2.1416766441,1.6085342738\B,2.3497253303,1.4465755193,0.3961
289268\B,1.3742027653,2.1848832315,-1.0044829648\B,-0.2509862353,1.415
0302259,-0.7807202921\B,-0.4196450169,1.3858536023,1.0719419678\B,1.12
56449798,0.3748043457,1.1953496426\B,1.3052712775,0.4047938589,-0.6443
764908\B,1.8489805185,3.0854529655,0.3714901183\C,-0.0765937584,0.1113
698363,0.1426786014\H,-0.5682792057,3.8178798508,0.1577464314\H,1.2399
```

013875,2.4555074416,2.7500235499\H,3.4986886587,1.1587659759,0.4997989  
338\H,1.6864516645,2.5221515677,-2.1008098807\H,-1.0903183683,1.410759  
9631,-1.6207052953\H,-1.3907002308,1.3693070489,1.7493159883\H,1.42792  
12289,-0.4655944471,1.9710681101\H,1.7601589111,-0.4096028063,-1.37303  
93192\C,-3.2878917613,-1.9605593134,-0.1465950082\C,-2.3878301344,-0.7  
745093628,0.2376771822\N,-0.9323117522,-1.1112781964,0.0141101645\C,-0  
.8040415011,-1.7161926317,-1.3626065946\C,-1.5111784094,-3.0791391941,  
-1.4238120812\C,-2.4569814127,-3.2494785796,-0.2266294874\H,-2.6039178  
151,0.1077184341,-0.340167338\H,-2.4819344883,-0.5236142186,1.28034845  
3\H,-3.7683319187,-1.7759538481,-1.1020731948\H,-1.227725232,-0.998466  
0641,-2.0471331862\H,0.2447576812,-1.8021061245,-1.5754700359\H,-0.778  
433647,-3.8795236224,-1.4305043937\H,-2.0625781117,-3.148755073,-2.354  
9740839\H,-4.0753201743,-2.0431135946,0.5919178418\C,-0.5494738108,-2.  
1596493457,1.0237895167\H,-0.4913923589,-1.6707297233,1.9806501079\H,0.  
.4428392022,-2.4915556649,0.7590784632\C,-1.5755215916,-3.3084033783,1  
.0303885918\H,-2.1876496344,-3.243415281,1.9221973614\H,-1.0459295869,  
-4.2538172915,1.0783806236\C,2.7072053358,4.4313017717,0.5004421439\C,  
3.9060947241,4.5394802847,-0.4525494961\H,3.0665383533,4.5285065933,1.  
5248176523\H,2.0548416554,5.2894286801,0.3390540652\C,4.7019488559,5.8  
360106964,-0.2837719479\H,4.5705405494,3.691670928,-0.2977887991\H,3.5  
60064683,4.46630097,-1.4814506274\C,5.8963279003,5.9466396163,-1.23353  
34801\H,4.0397292507,6.6867818203,-0.4395030543\H,5.0532261196,5.91058  
28184,0.7446164708\H,6.5597396232,5.0968839568,-1.078505375\H,5.546473  
9506,5.8734258771,-2.2623602547\C,6.6922088325,7.2423476265,-1.0648224  
376\C,7.8832132334,7.3441078237,-2.0175587618\H,7.0451338339,7.3168959  
93,-0.0381845685\H,6.0321896584,8.0931861553,-1.2215344772\H,8.4273001  
491,8.2731517493,-1.8738310682\H,8.5803977579,6.52528525,-1.8619565648  
\H,7.5597840201,7.30745894,-3.0542867762\C,-3.3170543144,-4.5085136509  
, -0.4181204138\C,-4.2122635057,-4.9263583938,0.753369915\H,-2.65181946  
9,-5.3364158061,-0.6557466479\H,-3.937350061,-4.3597304848,-1.29974421  
9\C,-5.0555030706,-6.1604701241,0.4215640932\H,-3.6043441979,-5.141657  
2832,1.6283209078\H,-4.8765859637,-4.112397944,1.032290729\H,-5.674513  
2922,-5.9505030054,-0.4487877525\H,-4.3981430903,-6.9802291844,0.13729  
16547\C,-5.948647161,-6.6085115237,1.5798717511\C,-6.7885520474,-7.839  
5648591,1.2417953507\H,-6.6063963925,-5.7902331124,1.8649658055\H,-5.3  
309136264,-6.8209923871,2.4497530518\H,-7.4101691867,-8.132479439,2.08  
17136592\H,-7.4434285395,-7.6477362607,0.3966988725\H,-6.1582296821,-8  
.6862949431,0.9856652543\\Version=x86-Linux-G98RevA.9\HF=-1021.741392\  
RMSD=6.163e-09\RMSF=1.450e-06\Dipole=-3.6338215,-5.1845003,-0.3135964\  
PG=C01 [X(C19H44B9N1)]\@

## 2

1\1\GINC-MONSTER\Fopt\RHf\6-31G(d)\C17H41B9S1\PIOTR\03-Apr-2008\0\#\#P  
HF/6-31G\* FOPT GEOM(NOANGLE, NODISTANCE) FCHECK\10-hexyl-1-(4-Pentyl-  
thiaChx-1-yl)-CB9, C1\0,1\B,1.0596246201,-2.3877232434,-0.3693381841\  
B,1.3068294858,-2.6558818555,1.4555293807\B,-0.529349199,-2.5956337933  
,1.7156396326\B,-0.777450954,-2.3268488618,-0.113543597\B,0.2052634335  
, -3.5806735971,0.5191407523\C,0.1483788431,-5.1648496262,0.2975727121\  
C,-1.2570515653,-5.7822639994,0.3332323339\C,-1.2598693093,-7.29846279  
67,0.1238629887\C,-2.6592252343,-7.9160325958,0.1581086523\C,-2.662382  
8936,-9.4316432259,-0.0507846988\C,-4.0642801133,-10.0398417782,-0.015  
0932837\H,1.7176504983,-2.6926516125,-1.3111975472\H,2.1745752276,-3.1  
932558636,2.0641064676\H,-1.2310344641,-3.0711994423,2.5484835254\H,-1  
.6902415992,-2.5678339762,-0.8357386303\H,0.7630433261,-5.6529255242,1  
.0536912112\H,0.6131808867,-5.4100147523,-0.6573042975\H,-1.729871946,  
-5.5540146275,1.2862759688\H,-1.8778588633,-5.3169918739,-0.4296532031  
\H,-0.7885877411,-7.5301458821,-0.8304772699\H,-0.6417424541,-7.767635  
7935,0.888203972\H,-3.1313766421,-7.6856622199,1.1121343688\H,-3.27819

07929,-7.4485014027,-0.606451929\H,-2.04657473,-9.9015565761,0.7134191  
948\H,-2.1931091889,-9.6645347434,-1.004541242\H,-4.033510472,-11.1150  
18184,-0.1660546054\H,-4.5477658305,-9.8538745859,0.9400814748\H,-4.69  
54879583,-9.6150543547,-0.7909044988\B,0.1701224021,-0.8109312087,-0.4  
148531654\B,1.65036469,-1.0436676094,0.7032076217\B,0.5212354142,-1.19  
10662309,2.175388866\B,-0.9601236972,-0.9583948891,1.0698826357\C,0.3  
909985208,-0.0866235795,1.0021525408\S,0.4899429181,1.6439356308,1.310  
2210194\C,-0.9878253632,2.3678903191,0.5427041426\C,-0.8339798777,3.88  
67267362,0.4439116181\C,0.3364485126,4.3457419257,-0.4400115702\C,1.67  
36856278,3.806154221,0.0912386352\C,1.7438973898,2.2788998954,0.160488  
8098\C,0.3341627333,5.878159079,-0.5537910046\C,1.3154331245,6.4598095  
807,-1.5759637771\C,1.1575117278,7.9727943951,-1.7445280128\C,2.139209  
585,8.5722510664,-2.7530246749\C,1.9729329524,10.0820941425,-2.9201590  
353\H,0.0550586665,-0.1424853343,-1.3905226352\H,2.7322589238,-0.56423  
43086,0.6277974031\H,0.6895359746,-0.8067378745,3.2835732714\H,-1.9876  
90231,-0.4093322178,1.2905135277\H,-1.1128293493,1.9037544406,-0.42589  
16334\H,-1.8199987525,2.0884723801,1.1715750238\H,-0.7336258853,4.3100  
45264,1.4403915811\H,-1.7656028545,4.2680201506,0.0391258179\H,0.18158  
67743,3.9331249785,-1.4364554503\H,2.4856887965,4.1172402987,-0.554648  
3\H,1.8778732681,4.2277939616,1.0726915127\H,1.5677959268,1.8165273527  
, -0.8009901096\H,2.6962051588,1.9388475719,0.5393002987\H,-0.670533202  
3,6.1935178173,-0.8251136396\H,0.5319362349,6.3095586935,0.4262314118\H,  
2.3395341511,6.2465079271,-1.2812670196\H,1.163765865,5.9735064404,-  
2.5380042751\H,0.1394488242,8.1957552086,-2.0584210469\H,1.2923562858,  
8.4587097834,-0.7796903486\H,3.1573957506,8.3541792267,-2.438008646\H,  
2.006972625,8.085619482,-3.7168928599\H,2.6822305672,10.4771406777,-3.  
6402675782\H,0.9746545237,10.3306336178,-3.2687685975\H,2.1329490717,1  
0.6010196727,-1.9793850522\\Version=x86-Linux-G98RevA.9\HF=-1287.31914  
9\RMSD=7.449e-09\RMSF=1.115e-06\Dipole=0.3133819,6.0728089,-0.4295001\  
PG=C01 [X(C17H41B9S1)]\@

## 10. References

- 1 A. Krasovskiy, P. Knochel *Synthesis* 2006, **5**, 890-891.
- 2 K. A. Bairamov, A. G. Douglass, P. Kaszynski *Synth. Commun.* 1998, **28**, 527-540.
- 3 B. Ringstrand, P. Kaszynski, H. Monobe *J. Mater. Chem.* 2009, **19**, 4805-4812.
- 4 J. Thomas, D. Clough, *J. Pharm. Pharmacol.* 1963, **15**, 167-177. N. P. Volynskii, L. P. Shcherbakova, *Bull. Acad. Sci. USSR, Div. Chem. Sci.* 1979, **28**, 1006-1009.
- 5 S. Urban, J. Kedzierski, R. Dabrowski *Z. Naturforsch.* 2000, **55A**, 449-456.
- 6 W. Piecek, J. M. Kaufman, P. Kaszynski *Liq. Cryst.* 2003, **30**, 39-48.
- 7 SAINT, Bruker Analytical X-Ray Systems, Madison, WI, current version.
- 8 An empirical correction for absorption anisotropy, R. Blessing, *Acta Cryst.* **1995**, *A51*, 33-38.
- 9 Sir2004, a Program for Automatic Solution and Refinement of Crystal Structure. M. C. Burla, R. Caliendo, M. Carnalli, B. Carrozzini, G. L. Cascarano, L. De Caro, C. Giacovazzo, G. Polidori, R. Sagna. version 1.0 (2004).
- 10 SHELXTL-Plus, Bruker Analytical X-Ray Systems, Madison, WI, current version.
